# Supplementary material for: Prenatal exposure to nitrate from drinking water and the risk of preterm birth: A Danish nationwide cohort study
Source: PubMed Central journal article supplement — Environ Epidemiol. 2022 Aug 23;6(5):e223. doi: 10.1097/EE9.0000000000000223 (PMC9556052; doi:10.1097/ee9.0000000000000223), 2022-08-23
Supplement: ee9-6-e223-s001.pdf [file ee9-6-e223-s001.pdf]

1 **SUPPLEMENTAL TABLES**

2

3 **Table S1. Characteristics of the study population by preterm birth, 1991–2015.**

| Characteristic                              | Preterm<br>( <i>n</i> =51,747) | Full term<br>( <i>n</i> =957,442) |
|---------------------------------------------|--------------------------------|-----------------------------------|
| Nitrate pregnancy category, <i>n</i> (%)    |                                |                                   |
| ≤2 mg/L                                     | 26,616 (51)                    | 502,556 (52)                      |
| >2–5 mg/L                                   | 16,547 (32)                    | 301,588 (32)                      |
| >5–25 mg/L                                  | 6,579 (13)                     | 118,023 (12)                      |
| >25 mg/L)                                   | 2,005 (4)                      | 35,275 (4)                        |
| Sex, <i>n</i> (%)                           |                                |                                   |
| Female                                      | 22,959 (44)                    | 469,155 (49)                      |
| Male                                        | 28,788 (56)                    | 488,287 (51)                      |
| Birth order, <i>n</i> (%)                   |                                |                                   |
| 1                                           | 28,874 (56)                    | 411,932 (43)                      |
| 2                                           | 15,022 (29)                    | 379,630 (40)                      |
| ≥3                                          | 7,851 (15)                     | 165,880 (17)                      |
| Short interpregnancy interval, <i>n</i> (%) |                                |                                   |
| No                                          | 432 (1)                        | 1,832 (0)                         |
| Yes                                         | 22,441 (43)                    | 543,678 (57)                      |
| Missing ( <i>i.e.</i> , only child)         | 28,874 (56)                    | 411,932 (43)                      |
| Region, <i>n</i> (%)                        |                                |                                   |
| Capital                                     | 14,880 (29)                    | 293,581 (31)                      |
| North Jutland                               | 5,758 (11)                     | 98,482 (10)                       |
| Mid Jutland                                 | 12,370 (24)                    | 231,705 (24)                      |
| Southern Denmark                            | 11,271 (22)                    | 201,784 (21)                      |
| Zealand                                     | 7,468 (14)                     | 131,890 (14)                      |
| Urbanicity, <i>n</i> (%)                    |                                |                                   |
| Capital                                     | 16,999 (33)                    | 304,528 (32)                      |
| Suburb of the capital                       | 15,326 (30)                    | 273,251 (29)                      |
| Provincial city <sup>b</sup>                | 6,831 (13)                     | 136,795 (14)                      |
| Provincial town <sup>c</sup>                | 6,156 (12)                     | 121,590 (13)                      |
| Rural areas <sup>d</sup>                    | 6,435 (12)                     | 121,278 (13)                      |
| Year of birth, <i>n</i> (%)                 |                                |                                   |
| Q1 (1991–1996)                              | 12,211 (24)                    | 239,254 (25)                      |
| Q2 (1997–2002)                              | 12,583 (24)                    | 231,200 (24)                      |
| Q3 (2003–2008)                              | 13,644 (26)                    | 235,145 (25)                      |
| Q4 (2009–2015)                              | 13,309 (26)                    | 251,843 (26)                      |
| Season of birth, <i>n</i> (%)               |                                |                                   |
| January–March                               | 12,537 (24)                    | 231,861 (24)                      |
| April–June                                  | 13,128 (25)                    | 242,135 (25)                      |
| July–September                              | 13,328 (26)                    | 257,333 (27)                      |
| October–December                            | 12,754 (25)                    | 226,113 (24)                      |
| Maternal age (years), <i>n</i> (%)          |                                |                                   |
| <25                                         | 8,324 (16)                     | 126,998 (13)                      |
| 25–29                                       | 18,808 (36)                    | 347,758 (36)                      |
| 30–34                                       | 16,210 (31)                    | 333,614 (35)                      |

|                                                        |             |              |
|--------------------------------------------------------|-------------|--------------|
| ≥35                                                    | 8,405 (16)  | 149,072 (16) |
| Maternal smoking <sup>e</sup> , <i>n</i> (%)           |             |              |
| No                                                     | 37,748 (73) | 758,681 (79) |
| Yes                                                    | 13,999 (27) | 198,761 (21) |
| Maternal BMI, <i>n</i> (%)                             |             |              |
| <18.5                                                  | 1,246 (2)   | 17,098 (2)   |
| 18.5–24.9                                              | 14,034 (27) | 269,761 (28) |
| 25–29.9                                                | 4,907 (9)   | 89,506 (9)   |
| ≥30                                                    | 3,298 (6)   | 53,713 (6)   |
| Missing <sup>f</sup>                                   | 28,262 (55) | 527,364 (55) |
| Maternal education <sup>g</sup> , <i>n</i> (%)         |             |              |
| Primary school                                         | 14,892 (29) | 214,286 (22) |
| High school                                            | 23,543 (46) | 444,333 (46) |
| Higher education                                       | 13,312 (26) | 298,823 (31) |
| Maternal employment status <sup>g</sup> , <i>n</i> (%) |             |              |
| Employed                                               | 40,631 (79) | 777,392 (81) |
| Unemployed                                             | 3,343 (6)   | 56,683 (6)   |
| Not seeking work                                       | 7,773 (15)  | 123,367 (13) |
| Maternal income <sup>h</sup> , <i>n</i> (%)            |             |              |
| Q1                                                     | 14,243 (28) | 233,500 (24) |
| Q2                                                     | 12,950 (25) | 238,764 (25) |
| Q3                                                     | 12,320 (24) | 240,982 (25) |
| Q4                                                     | 12,234 (24) | 244,196 (26) |
| Paternal age (years), <i>n</i> (%)                     |             |              |
| <25                                                    | 4,255 (8)   | 63,583 (7)   |
| 25–29                                                  | 15,110 (29) | 259,702 (27) |
| 30–34                                                  | 17,703 (34) | 353,870 (37) |
| ≥35                                                    | 14,679 (28) | 280,287 (29) |
| Paternal education <sup>g</sup> , <i>n</i> (%)         |             |              |
| Primary school                                         | 13,495 (26) | 203,904 (21) |
| High school                                            | 26,233 (51) | 490,111 (51) |
| Higher education                                       | 11,298 (22) | 253,229 (26) |
| Missing                                                | 721 (1)     | 10,198 (1)   |
| Paternal employment status <sup>g</sup> , <i>n</i> (%) |             |              |
| Employed                                               | 45,456 (88) | 859,349 (90) |
| Unemployed                                             | 2,586 (5)   | 37,014 (4)   |
| Not seeking work                                       | 3,758 (7)   | 58,032 (6)   |
| Missing                                                | 175 (0)     | 3,047 (0)    |
| Paternal income <sup>h</sup> , <i>n</i> (%)            |             |              |
| Q1                                                     | 14,280 (28) | 233,849 (24) |
| Q2                                                     | 13,182 (25) | 237,891 (25) |
| Q3                                                     | 12,682 (25) | 241,109 (25) |
| Q4                                                     | 11,565 (22) | 244,096 (25) |
| Missing                                                | 38 (0)      | 497 (0)      |

4 Note: BMI = body mass index. All X<sup>2</sup> tests for difference between strata were significant at  $P \leq 0.001$ .

- 5 *a.* The study population: full-term singleton live births in Denmark from January 1, 1991 to December 31, 2015 to  
6 Danish-born parents who had a nitrate estimate for each day of pregnancy, and with non-missing covariates in the  
7 base model  
8 *b.* Municipalities having a town with > 100,000 inhabitants  
9 *c.* Municipalities having a town with between 10,000 and 100,000 inhabitants  
10 *d.* Municipalities in Denmark where the largest town has < 10,000 inhabitants  
11 *e.* For children born in the period before 1997 smoking was recorded at the first visit with the midwife with no  
12 specifications as to the timing. For children born from 1997 onward smoking is during pregnancy  
13 *f.* Available from 2003 onward only  
14 *g.* As reported two years prior to birth  
15 *h.* As reported two years before birth and standardized to 2013 values

16 **Table S2. Comparison of the effect estimates of the associations between nitrate and preterm birth among**  
 17 **those with two or more birth to liveborn singletons within the study period without and after additional**  
 18 **adjustment for a short interpregnancy interval (<1 year between births).**

| Nitrate (mg/L)              | Total (n) | Cases (n) | Without short interpregnancy interval |         | With short interpregnancy interval |         |
|-----------------------------|-----------|-----------|---------------------------------------|---------|------------------------------------|---------|
|                             |           |           | OR (95% CI)                           | P value | OR (95% CI)                        | P value |
| ≤2                          | 301,822   | 11,678    | Ref (1)                               |         | Ref (1)                            |         |
| >2–5                        | 171,805   | 7,133     | 1.06 (1.03, 1.09)                     | <0.001  | 1.06 (1.03, 1.09)                  | <0.001  |
| >5–25                       | 73,542    | 3,172     | 1.07 (1.03, 1.12)                     | 0.001   | 1.07 (1.03, 1.12)                  | 0.001   |
| >25                         | 21,214    | 890       | 1.06 (0.99, 1.14)                     | 0.10    | 1.06 (0.99, 1.14)                  | 0.09    |
| Trend                       | 568,383   | 22,873    |                                       | <0.001  |                                    | <0.001  |
| Continuous<br>(per 10 mg/L) | 568,383   |           | 1.02 (1.00, 1.04)                     | 0.04    | 1.02 (1.00, 1.04)                  | 0.04    |

19 Note: OR = odds ratio; CI = confidence interval. Models were fitted using logistic regression with generalized estimating equations to control for  
 20 the non-independence of births from the same mother and were controlled for calendar year, sex, gravidity, urbanicity, and maternal age,  
 21 smoking, education, income, and employment status.

22 **Table S3. Comparison of odds of preterm birth restricted to those with a BMI value unadjusted and adjusted**  
 23 **for pre-pregnancy BMI.**

| Nitrate (mg/L)           | Total ( <i>n</i> ) | Cases ( <i>n</i> ) | Without adjustment for BMI |                | With adjustment for BMI |                |
|--------------------------|--------------------|--------------------|----------------------------|----------------|-------------------------|----------------|
|                          |                    |                    | OR (95% CI)                | <i>P</i> value | OR (95% CI)             | <i>P</i> value |
| ≤2                       | 252,424            | 12,767             | Ref (1)                    |                | Ref (1)                 |                |
| >2–5                     | 144,045            | 7,580              | 1.06 (1.02, 1.09)          | 0.001          | 1.06 (1.02, 1.09)       | 0.001          |
| >5–25                    | 41,739             | 2,254              | 1.03 (0.99, 1.09)          | 0.16           | 1.03 (0.99, 1.08)       | 0.17           |
| >25                      | 15,355             | 884                | 1.09 (1.01, 1.17)          | 0.03           | 1.09 (1.01, 1.17)       | 0.03           |
| Trend                    | 453,563            | 23,485             |                            | 0.001          |                         | 0.001          |
| Continuous (per 10 mg/L) | 453,563            | 23,485             | 1.02 (1.00, 1.04)          | 0.05           | 1.02 (1.00, 1.04)       | 0.05           |

24 Note: BMI = body mass index; OR = odds ratio; CI = confidence interval.

25 Models were fitted using logistic regression with generalized estimating equations in order to control for the non-independence of births from the  
 26 same mother and were controlled for calendar year, sex, gravidity, urbanicity, and maternal age, smoking, education, income, and employment  
 27 status.

28 **Table S4. Odds of preterm birth adding additional adjustment for covariates not included *a priori* to the main model.**

| Nitrate (mg/L)              | Total ( <i>n</i> ) | Cases ( <i>n</i> ) | Season of birth   |                | Paternal age      |                | Total ( <i>n</i> ) | Cases ( <i>n</i> ) | Paternal SES indicators <sup>b</sup> |                |
|-----------------------------|--------------------|--------------------|-------------------|----------------|-------------------|----------------|--------------------|--------------------|--------------------------------------|----------------|
|                             |                    |                    | OR (95% CI)       | <i>P</i> value | OR (95% CI)       | <i>P</i> value |                    |                    | OR (95% CI)                          | <i>P</i> value |
| ≤2                          | 529,172            | 26,616             | Ref (1)           |                | Ref (1)           |                | 523,310            | 26,260             | Ref (1)                              |                |
| >2–5                        | 318,135            | 16,547             | 1.03 (1.01, 1.06) | 0.002          | 1.03 (1.01, 1.06) | 0.002          | 313,653            | 16,250             | 1.03 (1.01, 1.05)                    | 0.01           |
| >5–25                       | 124,602            | 6,579              | 1.04 (1.01, 1.07) | 0.01           | 1.04 (1.01, 1.07) | 0.01           | 123,029            | 6,485              | 1.04 (1.01, 1.07)                    | 0.01           |
| >25                         | 37,280             | 2,005              | 1.05 (1.00, 1.10) | 0.06           | 1.05 (1.00, 1.10) | 0.06           | 36,929             | 1,968              | 1.04 (0.99, 1.09)                    | 0.14           |
| Trend                       | 1,009,189          | 51,747             |                   | <0.001         |                   | <0.001         | 996,921            | 50,963             |                                      | 0.001          |
| Continuous<br>(per 10 mg/L) | 1,009,189          | 51,747             | 1.01 (1.00, 1.03) | 0.04           | 1.01 (1.00, 1.03) | 0.04           | 996,921            | 50,963             | 1.01 (1.00, 1.02)                    | 0.08           |

29 Note: OR = odds ratio; CI = confidence interval; SES = socioeconomic status.

30 Models were fitted using logistic regression with generalized estimating equations in order to control for the non-independence of births from the same mother.

31 *a.* Main model: controlled for calendar year, sex, gravidity, urbanicity, and maternal age, smoking, education, income, and employment status.

32 *b.* Paternal SES indicators: education, income and employment status

33

34  
35  
36

**Table S5. Adjusted odds of preterm birth and preterm birth sub-categories given pregnancy concentrations of nitrate in drinking water including *n*=74,067 post-term births through 44 weeks in the referent category.**

| Category of birth                   |                    | Mean pregnancy nitrate exposure (mg/L) |                   |                   |                   | Trend     | Continuous (per 10 mg/L) |
|-------------------------------------|--------------------|----------------------------------------|-------------------|-------------------|-------------------|-----------|--------------------------|
|                                     |                    | ≤2                                     | >2–5              | >5–25             | >25               |           |                          |
| All preterm<br>(140–258 days)       | Total ( <i>n</i> ) | 566,853                                | 341,607           | 134,729           | 40,067            | 1,083,256 | 1,083,256                |
|                                     | Cases ( <i>n</i> ) | 26,616                                 | 16,547            | 6,579             | 2,005             | 51,747    | 51,747                   |
|                                     | OR (95% CI)        | Ref (1)                                | 1.03 (1.01, 1.05) | 1.04 (1.01, 1.07) | 1.05 (1.00, 1.10) |           | 1.01 (1.00, 1.03)        |
|                                     | <i>P</i> value     |                                        | 0.005             | 0.01              | 0.05              | <0.001    | 0.04                     |
| Extremely preterm<br>(140–195 days) | Total ( <i>n</i> ) | 566,853                                | 341,607           | 134,729           | 40,067            | 1,083,256 |                          |
|                                     | Cases ( <i>n</i> ) | 1,094                                  | 690               | 263               | 70                | 2,117     | 2,117                    |
|                                     | OR (95% CI)        | Ref (1)                                | 1.03 (0.93, 1.14) | 1.06 (0.92, 1.21) | 0.93 (0.72, 1.20) |           | 1.01 (0.94, 1.07)        |
|                                     | <i>P</i> value     |                                        | 0.54              | 0.41              | 0.56              | 0.72      | 0.86                     |
| Very preterm<br>(196–223 days)      | Total ( <i>n</i> ) | 565,759                                | 340,917           | 134,466           | 39,997            | 1,081,139 | 1,081,139                |
|                                     | Cases ( <i>n</i> ) | 2,642                                  | 1,581             | 670               | 201               | 5,094     | 5,094                    |
|                                     | OR (95% CI)        | Ref (1)                                | 1.00 (0.94, 1.07) | 1.05 (0.96, 1.15) | 1.03 (0.89, 1.19) |           | 1.01 (0.97, 1.05)        |
|                                     | <i>P</i> value     |                                        | 0.90              | 0.28              | 0.71              | 0.36      | 0.72                     |
| Moderate preterm<br>(224–258 days)  | Total ( <i>n</i> ) | 563,117                                | 339,336           | 133,796           | 39,796            | 1,076,045 | 1,076,045                |
|                                     | Cases ( <i>n</i> ) | 22,880                                 | 14,276            | 5,646             | 1,734             | 44,536    | 44,536                   |
|                                     | OR (95% CI)        | Ref (1)                                | 1.03 (1.01, 1.06) | 1.04 (1.01, 1.07) | 1.06 (1.01, 1.12) |           | 1.02 (1.00, 1.03)        |
|                                     | <i>P</i> value     |                                        | 0.003             | 0.01              | 0.03              | <0.001    | 0.03                     |

Note: OR = odds ratio; CI = confidence interval. Models were fitted using logistic regression with generalized estimating equations in order to control for the non-independence of births from the same mother and were controlled for calendar year, sex, gravidity, urbanicity, and maternal age, smoking, education, income, and employment status.

37  
38  
39

40 **Table S6.** Comparison of results for preterm birth with and without restricting analyses to children whose mothers pregnancy average nitrate  
 41 exposure was  $\leq 50$  mg/L.  
 42

| Nitrate (mg/L)              | Full Cohort |           |                   |         | Restricted Cohort $\leq 50$ mg/L |           |                 |         |
|-----------------------------|-------------|-----------|-------------------|---------|----------------------------------|-----------|-----------------|---------|
|                             | Total (n)   | Cases (n) | OR (95% CI)       | P value | Total (n)                        | Cases (n) | OR (95% CI)     | P value |
| $\leq 2$                    | 529,172     | 26,616    | Ref (1)           |         | 502,556                          | 26,616    | Ref (1)         |         |
| >2–5                        | 318,135     | 16,547    | 1.03 (1.01, 1.06) | 0.002   | 301,588                          | 16,547    | 1.03(1.01,1.06) | 0.002   |
| >5–25                       | 124,602     | 6,579     | 1.04 (1.01, 1.07) | 0.01    | 118,023                          | 6,579     | 1.04(1.01,1.07) | 0.006   |
| >25                         | 37,280      | 2,005     | 1.05 (1.00, 1.10) | 0.06    | 35,275                           | 2,005     | 1.06(1.01,1.11) | 0.03    |
| Trend                       | 1,009,189   | 51,747    |                   | 0.001   | 957,422                          | 51,747    |                 | 0.001   |
| Continuous<br>(per 10 mg/L) | 1,009,189   | 51,747    | 1.01 (1.00, 1.03) | 0.04    | 957,422                          | 51,747    | 1.02(1.01,1.04) | 0.009   |

43 Note.: OR = odds ratio; CI = confidence interval.

44 Models were fitted using logistic regression with generalized estimating equations in order to control for the non-independence of births from the same mother  
 45 and were controlled for calendar year, sex, gravidity, urbanicity, and maternal age, smoking, education, income, and employment status.  
 46  
 47
